# Supplementary material
Source: Research Square preprint supplement (doi:10.21203/rs.3.rs-9451647/v1)
Supplement: Supplementary file 1 [file 329c30b2c19e454a8dbd9c6d.pdf]

# Supporting Information

## Towards improved genomic decision with structure-assisted variant interpretation

Nathália P.D. de Nigro<sup>1,2 §</sup>, Paula F.C. Franklin<sup>1,2 §</sup>, Lucas A. Machado<sup>3,4</sup>, Daniel C.P. Câmara<sup>5</sup>, Roberta Soares Faccion<sup>4,6 \*</sup>, Zilton Vasconcelos<sup>4 \*</sup> and Mauricio G.S. Costa<sup>1,2 \*</sup>

1. Programa de Computação Científica, Vice-Presidência de Educação, Informação e Comunicação, Fundação Oswaldo Cruz. Av. Brasil 4365, 21040-900, Rio de Janeiro, Brazil.
2. Programa de Pós-Graduação em Biologia Computacional e Sistemas, Instituto Oswaldo Cruz, Fundação Oswaldo Cruz. Av. Brasil 4365, 21040-900, Rio de Janeiro, Brazil.
3. Instituto de Tecnologia em Imunobiológicos (Biomanguinhos) Fundação Oswaldo Cruz. Av. Brasil 4365, 21040-900, Rio de Janeiro, Brazil
4. Laboratório de Alta Complexidade (LACIFF), Unidade de Pesquisa Clínica, Instituto Nacional de Saúde da Mulher, da Criança e do Adolescente Fernandes Figueira (IFF), Fundação Oswaldo Cruz (Fiocruz), Av. Rui Barbosa, 716 – Flamengo, 22250-020, Rio de Janeiro, RJ, Brazil.
5. Brazilian Medical Unit - BRAMU, Médicos Sem Fronteiras Brasil, Rio de Janeiro, Brazil
6. Laboratório de Imunofisiologia, Instituto de Biofísica Carlos Chagas Filho, Universidade Federal do Rio de Janeiro, Av. Carlos Chagas Filho 373 – Centro de Ciências da Saúde – Cidade Universitária, 21941-902, Rio de Janeiro, RJ, Brazil.

**Supplementary Table 1:** Information related to the obtaining of curated models

|                       | <b>ADA2</b> | <b>CDC42</b> | <b>STING1</b>                         | <b>TBK1</b>     | <b>WDR1</b>     |
|-----------------------|-------------|--------------|---------------------------------------|-----------------|-----------------|
| Uniprot code          | Q9NZK5      | P60953       | Q86WV6                                | Q9UHD2          | O75083          |
| Template PDB code     | 3LGD        | 2NGR         | 6NT5                                  | 6NT9 / 6RSR     | -               |
| Biological assembly   | Homodimer   | Monomer      | Homodimer, forms high-order oligomers | Homodimer       | Monomer         |
| Template AlphaFold dB | -           | -            | AF-Q86WV6-F1-v4                       | AF-Q9UHD2-F1-v4 | AF-O75083-F1-v4 |
| Protein length        | 511         | 191          | 379                                   | 729             | 606             |
| Model length          | 482         | 191          | 343                                   | 658             | 606             |

**Supplementary Table 2:** Description of ACMG/AMP criteria considered in this study

| Criteria   | Description                                                                                                                                           | Class      | Evidence Strength     | Points   | Reference    |
|------------|-------------------------------------------------------------------------------------------------------------------------------------------------------|------------|-----------------------|----------|--------------|
| <b>BA1</b> | Allele frequency is >5% in Exome Sequencing Project, 1000 Genomes Project, or Exome Aggregation Consortium.                                           | benign     | stand alone           | NA       | ACMG/AMP [9] |
| <b>BS1</b> | Allele frequency is greater than expected for disorder.                                                                                               | benign     | strong                | -4       | VarSome [15] |
| <b>PM2</b> | Absent from controls (or at extremely low frequency if recessive) in Exome Sequencing Project, 1000 Genomes Project, or Exome Aggregation Consortium. | pathogenic | supporting            | +1       | ClinGen [12] |
| <b>BP1</b> | Missense variant in a gene for which primarily truncating variants are known to cause disease.                                                        | benign     | supporting            | +1       | VarSome [15] |
| <b>PP2</b> | Missense variant in a gene that has a low rate of benign missense variation and in which missense variants are a common mechanism of disease.         | pathogenic | supporting            | +1       | VarSome [15] |
| <b>PM1</b> | Located in a mutational hot spot and/or critical and well-established functional domain (e.g., active site of an enzyme) without benign variation.    | pathogenic | moderate              | +2       | ACMG/AMP [9] |
| <b>PM5</b> | Novel missense change at an amino acid residue where a different missense change determined to be pathogenic has been seen before.                    | pathogenic | moderate              | +2       | ACMG/AMP [9] |
| <b>PP3</b> | Multiple lines of computational evidence support a deleterious effect on the gene or gene product.                                                    | pathogenic | supporting, to strong | +1 to +4 | ClinGen [12] |
| <b>BP4</b> | Multiple lines of computational evidence suggest no impact on gene or gene product.                                                                   | benign     | supporting, to strong | -1 to -4 | ClinGen [12] |
| <b>PP5</b> | Reputable source recently reports variant as pathogenic, but the evidence is not available to the laboratory to perform an independent evaluation.    | pathogenic | supporting            | +1       | ACMG/AMP [9] |
| <b>BP6</b> | Reputable source recently reports variant as benign, but the evidence is not available to the laboratory to perform an independent evaluation.        | benign     | supporting            | -1       | ACMG/AMP [9] |

**Supplementary Table 3:** Thresholds adopted to adjust the strength of in silico predictors

|                              | REVEL            | AlphaMissense     | MetaRNN           |
|------------------------------|------------------|-------------------|-------------------|
| <b>Benign Strong</b>         | < 0.016          | <= 0.0853         | <= 0.108          |
| <b>Benign Moderate</b>       | 0.016 to 0.183   | > 0.0853 to 0.166 | > 0.108 to 0.267  |
| <b>Benign Supporting</b>     | > 0.183 to 0.29  | > 0.166 to 0.316  | > 0.267 to 0.43   |
| <b>Ambiguous</b>             | > 0.29 to 0.644  | >0.316 to 0.787   | > 0.43 to < 0.748 |
| <b>Pathogenic Supporting</b> | > 0.644 to 0.773 | > 0.787 to 0.956  | >= 0.748 to 0.841 |
| <b>Pathogenic Moderate</b>   | > 0.773 to 0.932 | > 0.956 to 0.994  | >= 0.841 to 0.939 |
| <b>Pathogenic Strong</b>     | > 0.932          | > 0.994           | >= 0.939          |

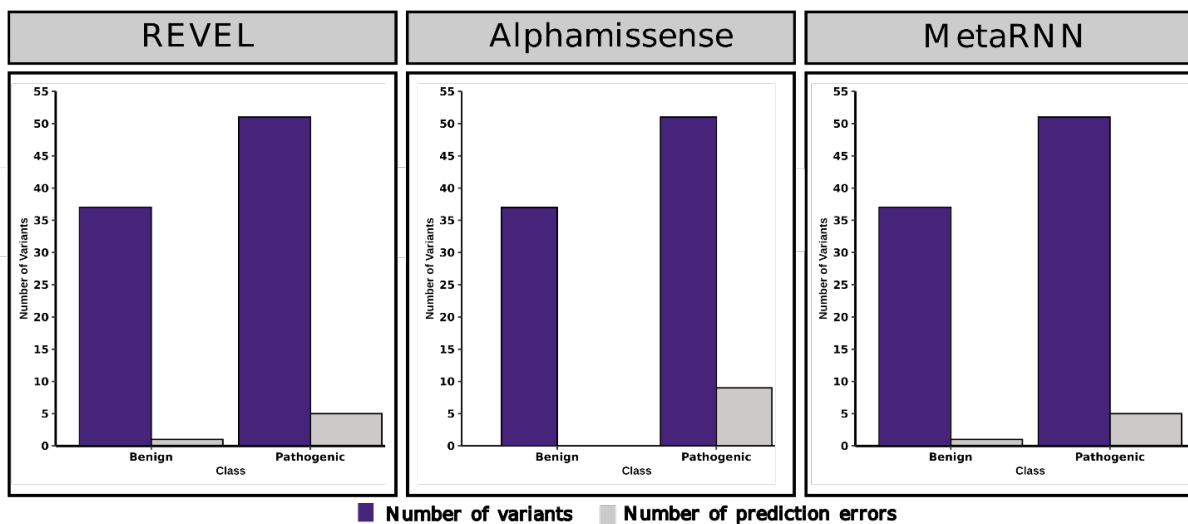

**Supplementary Figure 1:** Divergence between REVEL, AlphaMissense, and MetaRNN predictions and clinical evidence from ClinVar. Bar plots show the total number of variants labeled as Benign or Pathogenic in ClinVar for the genes in our dataset (purple) and the number of classification errors made by each predictor (gray). Errors occur when the prediction conflicts with the clinical classification (for example, a pathogenic variant predicted as benign).

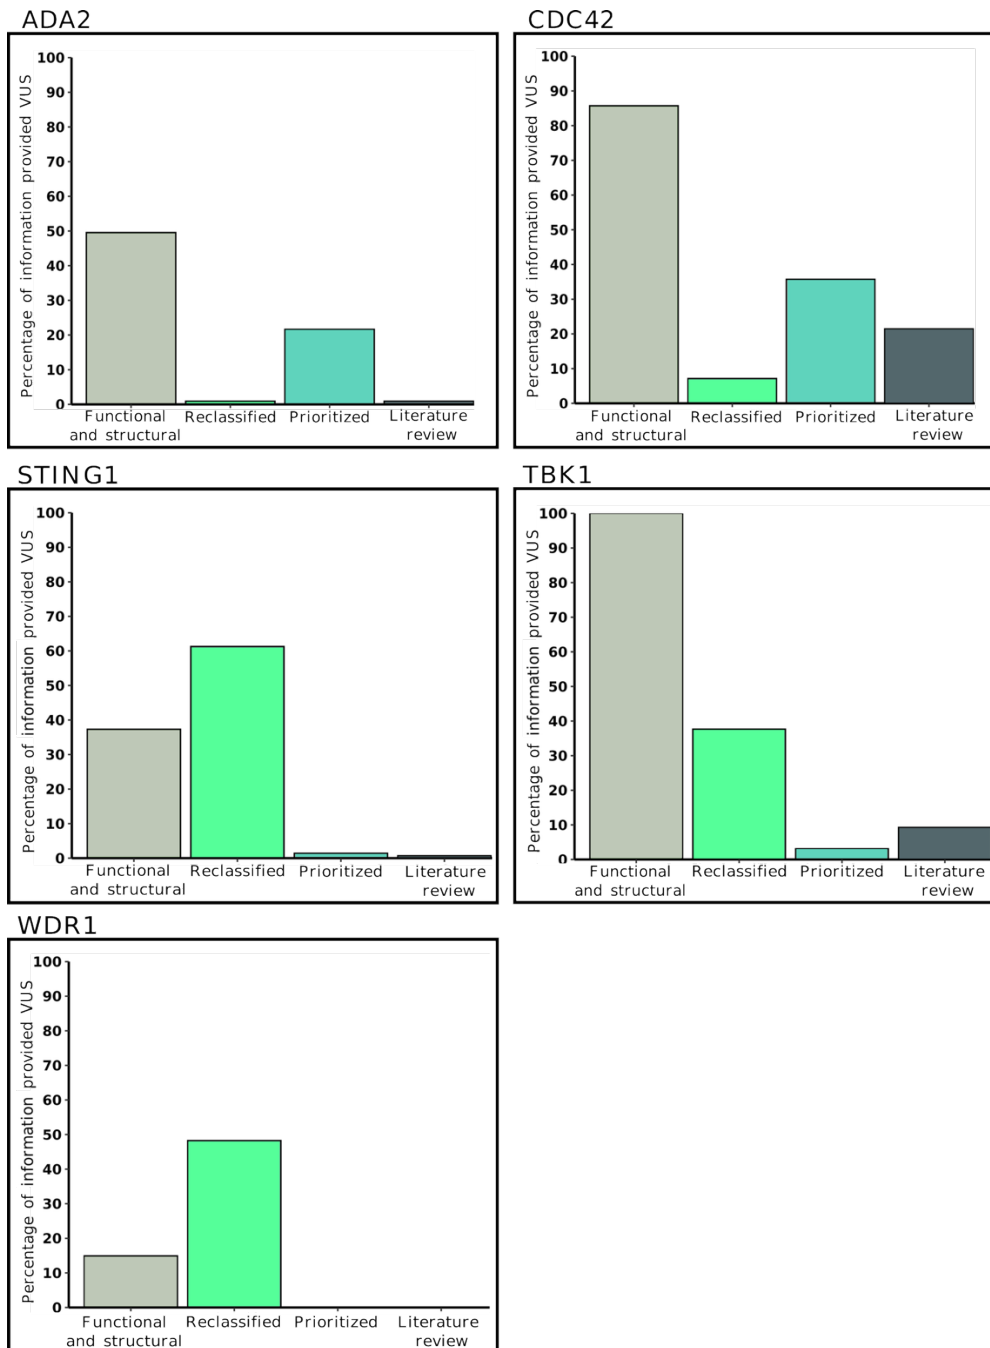

**Supplementary Figure 2: SAVI performance statistics per gene. Percentage of VUS for which SAVI provided information and/or reclassification.**
